# Supplementary material for: One step synthesis of ethyl levulinate biofuel by ethanolysis of renewable furfuryl alcohol over hierarchical zeolite catalyst
Source: Royal Society of Chemistry journal article supplement (doi:10.1039/c5ra13520f), 2015-01-01
Supplement: c5ra13520f1.pdf [file c5ra13520f1.pdf]

**Supporting Information for Publication**

**One Step Synthesis of Ethyl Levulinate Biofuel by Ethanolysis of Renewable Furfuryl  
Alcohol over Hierarchical Zeolite Catalyst**

**Kakasaheb Y. Nandiwale, Ashwini M. Pande and Vijay V. Bokade\***

Catalysis and Inorganic Chemistry Division, CSIR - National Chemical Laboratory, Pune-  
411008, India.

\*Correspondence to:

Dr. Vijay V. Bokade

Catalysis and Inorganic Chemistry Division,

CSIR - National Chemical Laboratory,

Pune-411008, India.

Ph; +91-20-25902458, Fax; +91-20-25902634

E-mail: [yv.bokade@ncl.res.in](mailto:yv.bokade@ncl.res.in)

**Table S1.** The Box-Behnken design matrix of the three process variables in coded units and the experimental and predicted response values.

| Run | Process variables in<br>coded units |                |                | EL Yield,<br>Y (%) |           | EMF Yield<br>(%) |
|-----|-------------------------------------|----------------|----------------|--------------------|-----------|------------------|
|     | X <sub>1</sub>                      | X <sub>2</sub> | X <sub>3</sub> | Experimental       | Predicted |                  |
| 1   | +                                   | 0              | +              | 48                 | 47.8      | 47               |
| 2   | 0                                   | +              | +              | 73                 | 72.2      | 24               |
| 3   | 0                                   | 0              | 0              | 54                 | 54        | 39               |
| 4   | 0                                   | 0              | 0              | 54                 | 54        | 39               |
| 5   | +                                   | -              | 0              | 27                 | 27.5      | 68               |
| 6   | -                                   | +              | 0              | 68                 | 67.5      | 26               |
| 7   | 0                                   | -              | +              | 43                 | 42.8      | 44               |
| 8   | -                                   | 0              | -              | 57                 | 57.2      | 37               |
| 9   | 0                                   | 0              | 0              | 54                 | 54        | 39               |
| 10  | 0                                   | 0              | 0              | 54                 | 54        | 39               |
| 11  | -                                   | -              | 0              | 53                 | 52        | 45               |
| 12  | 0                                   | -              | -              | 41                 | 41.8      | 49               |
| 13  | +                                   | 0              | -              | 42                 | 40.8      | 52               |
| 14  | 0                                   | 0              | 0              | 54                 | 54        | 39               |
| 15  | -                                   | 0              | +              | 62                 | 63.2      | 31               |
| 16  | +                                   | +              | 0              | 59                 | 60        | 36               |
| 17  | 0                                   | +              | -              | 60                 | 60.2      | 37               |

**Table S2.** ANOVA for response surface quadratic model.

| Source                        | Sum of squares | Df | Mean square | F-value | p-value<br>Prob > F |             |
|-------------------------------|----------------|----|-------------|---------|---------------------|-------------|
| Model                         | 1870.76        | 9  | 207.86      | 207.86  | < 0.0001            | significant |
| X <sub>1</sub>                | 512            | 1  | 512         | 512     | < 0.0001            |             |
| X <sub>2</sub>                | 1152           | 1  | 1152        | 1152    | < 0.0001            |             |
| X <sub>3</sub>                | 84.5           | 1  | 84.5        | 84.5    | < 0.0001            |             |
| X <sub>1</sub> X <sub>2</sub> | 72.25          | 1  | 72.25       | 72.25   | < 0.0001            |             |
| X <sub>1</sub> X <sub>3</sub> | 0.25           | 1  | 0.25        | 0.25    | 0.6324              |             |
| X <sub>2</sub> X <sub>3</sub> | 30.25          | 1  | 30.25       | 30.25   | 0.0009              |             |
| X <sub>1</sub> <sup>2</sup>   | 19.01          | 1  | 19.01       | 19.01   | 0.0033              |             |
| X <sub>2</sub> <sup>2</sup>   | 0.066          | 1  | 0.066       | 0.066   | 0.8049              |             |
| X <sub>3</sub> <sup>2</sup>   | 0.59           | 1  | 0.59        | 0.59    | 0.4668              |             |
| Residual                      | 7              | 7  | 1           |         |                     |             |
| Lack of Fit                   | 7              | 3  | 2.33        |         |                     |             |
| Pure Error                    | 0              | 4  | 0           |         |                     |             |
| Cor Total                     | 1877.76        | 16 |             |         |                     |             |

R<sup>2</sup> = 0.9963; R<sup>2</sup>-adjusted = 0.9915; R<sup>2</sup>-predicted = 0.9404; CV = 1.88%;

Adequate precision = 58.35.

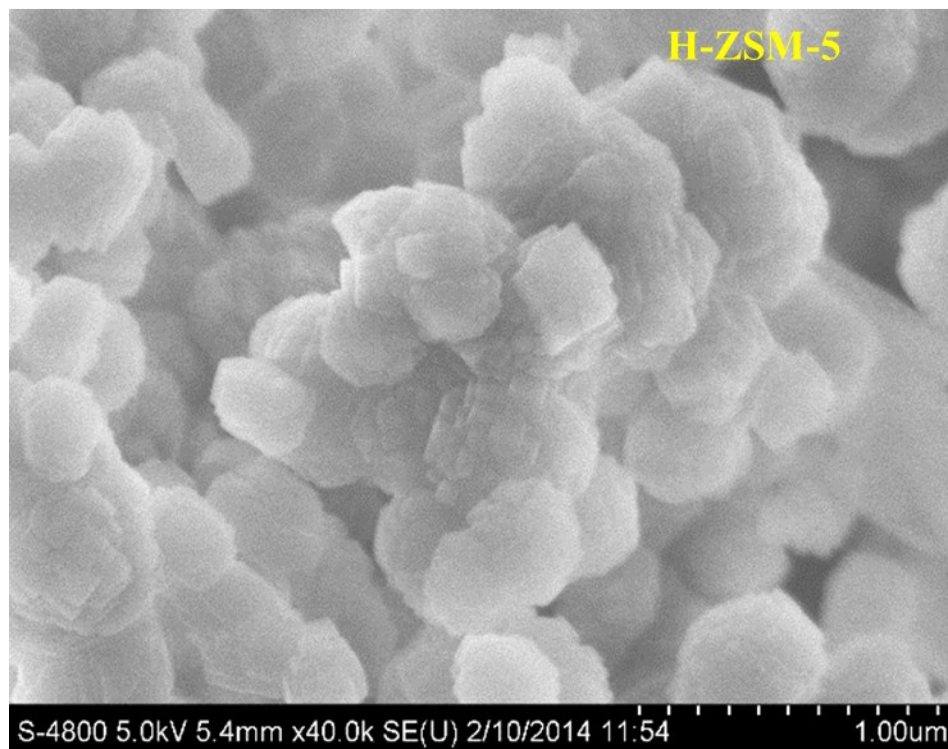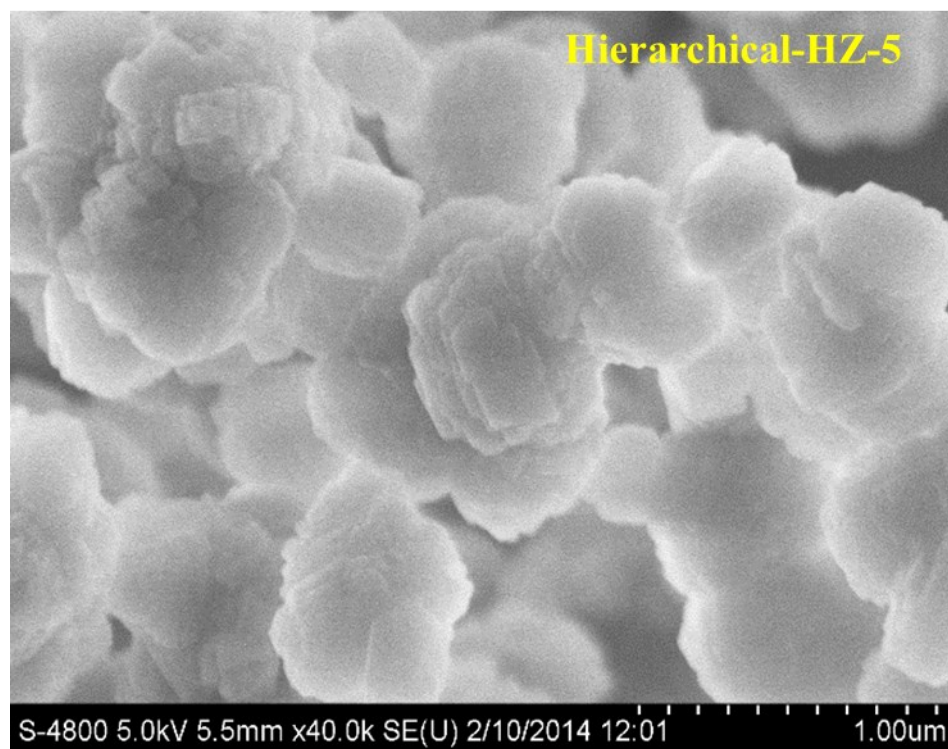

**Fig. S1:** FE-SEM images of H-ZSM-5 and Hierarchical-HZ-5 catalyst.
